# Supplementary material
Source: ML conference proceedings conference paper supplement (https://proceedings.mlr.press/v139/henderson21a.html)
Supplement: Supplementary file 1 [file henderson21a-supp.zip]

# 1 Graph Attribution Benchmarks

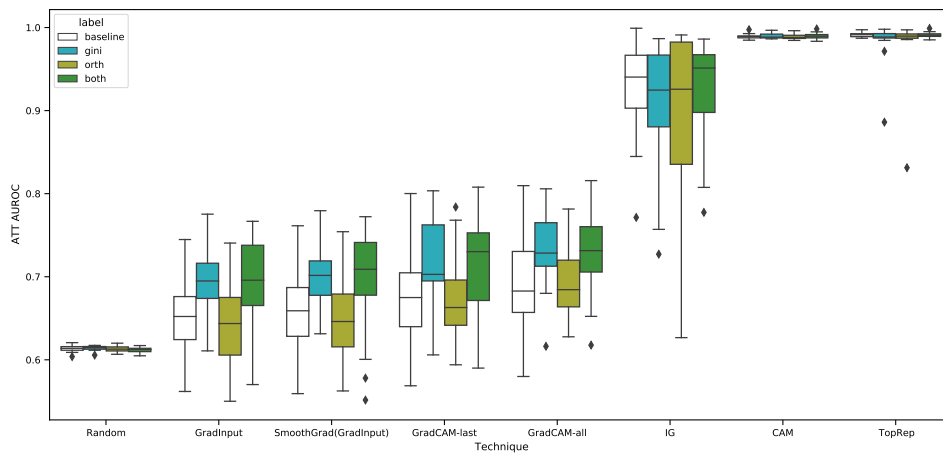

Figure 1: Benzene GCN

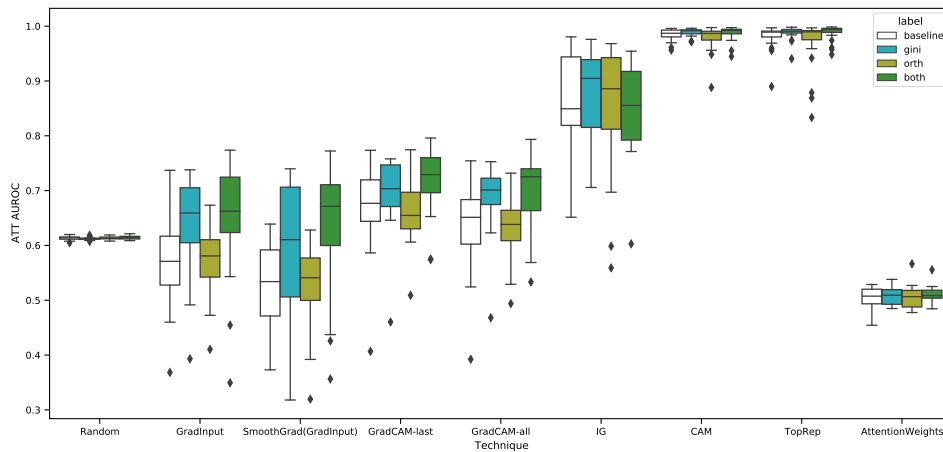

Figure 2: Benzene GAT

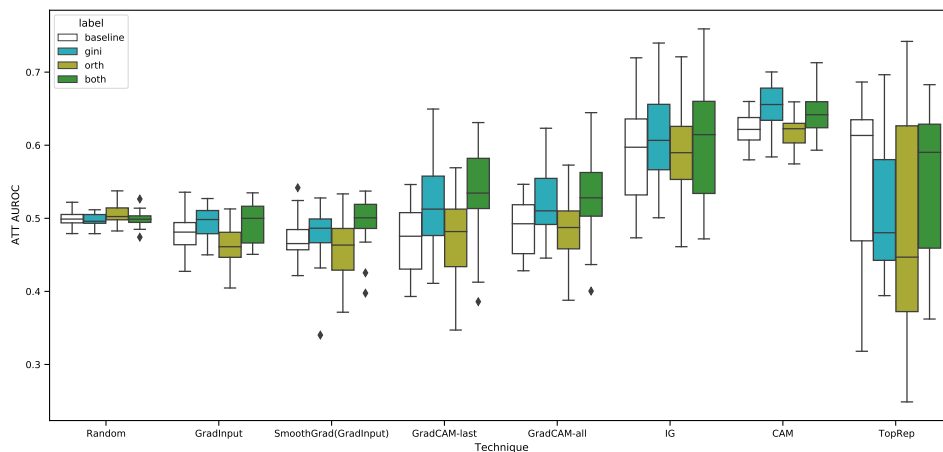

Figure 3: Amine-Ether-Benzene GCN

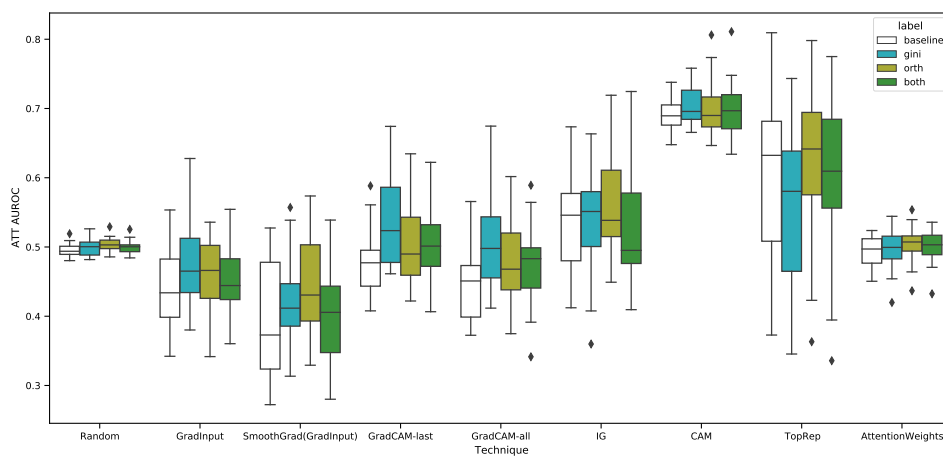

Figure 4: Amine-Ether-Benzene GAT

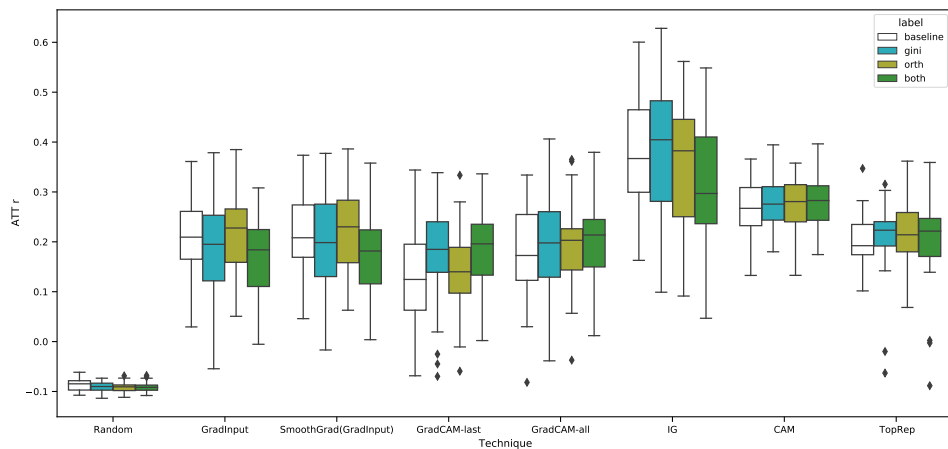

Figure 5: Crippen LogP GCN

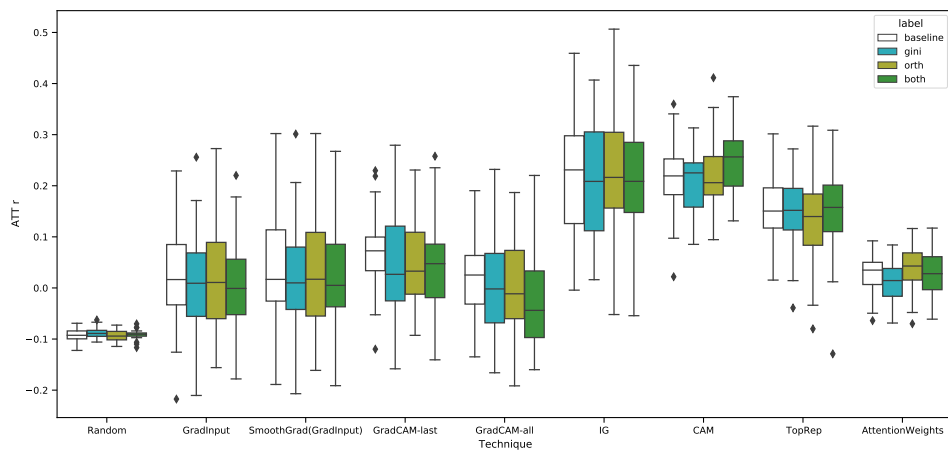

Figure 6: Crippen LogP GAT

## 2 Survey of medicinal chemists

SMILES strings for molecules can be found in `medchem_game_data.txt`.

Table 1: Raw count of votes per question and attribution method. Note that not all chemists voted on all questions.

| Endpoint      | Molecule        | CAM | CAM <sub>BRO+Gini</sub> | TopRep <sub>BRO+Gini</sub> | Random | None |
|---------------|-----------------|-----|-------------------------|----------------------------|--------|------|
| Solubility    | 5               | 1   | 3                       | 5                          | 3      | 0    |
|               | 1               | 6   | 4                       | 1                          | 0      | 3    |
|               | 7               | 2   | 1                       | 1                          | 7      | 1    |
|               | 8               | 2   | 3                       | 6                          | 1      | 0    |
|               | 10              | 2   | 2                       | 5                          | 5      | 0    |
|               | 22              | 2   | 7                       | 4                          | 1      | 0    |
|               | 13              | 4   | 3                       | 5                          | 2      | 0    |
|               | 2               | 0   | 2                       | 4                          | 5      | 3    |
|               | 19              | 5   | 4                       | 4                          | 0      | 0    |
|               | 4               | 0   | 2                       | 7                          | 4      | 1    |
| logD          | tamoxifen       | 1   | 10                      | 1                          | 1      | 0    |
|               | chlorpromazine  | 1   | 9                       | 2                          | 1      | 1    |
|               | bifonazole      | 3   | 10                      | 0                          | 1      | 0    |
|               | tolnaftate      | 1   | 10                      | 0                          | 1      | 1    |
|               | amiodarone      | 1   | 4                       | 3                          | 4      | 2    |
|               | loratadine      | 7   | 0                       | 6                          | 0      | 1    |
|               | trifluoperazine | 0   | 1                       | 9                          | 3      | 1    |
|               | thioridazine    | 0   | 5                       | 7                          | 0      | 2    |
| Melting point | 27              | 1   | 2                       | 4                          | 4      | 2    |
|               | 36              | 1   | 4                       | 4                          | 4      | 0    |
|               | 37              | 1   | 0                       | 4                          | 1      | 2    |
|               | 38              | 1   | 2                       | 5                          | 3      | 2    |
|               | 23              | 4   | 3                       | 3                          | 2      | 1    |
|               | 32              | 4   | 3                       | 1                          | 1      | 4    |
